# Supplementary material
Source: publisher figshare collection journal article supplement (https://sage.figshare.com/ndownloader/files/14507360)
Supplement: Supplementary file 1 [file 14507360]

Appendix 1.

Task 3: Balloon Task

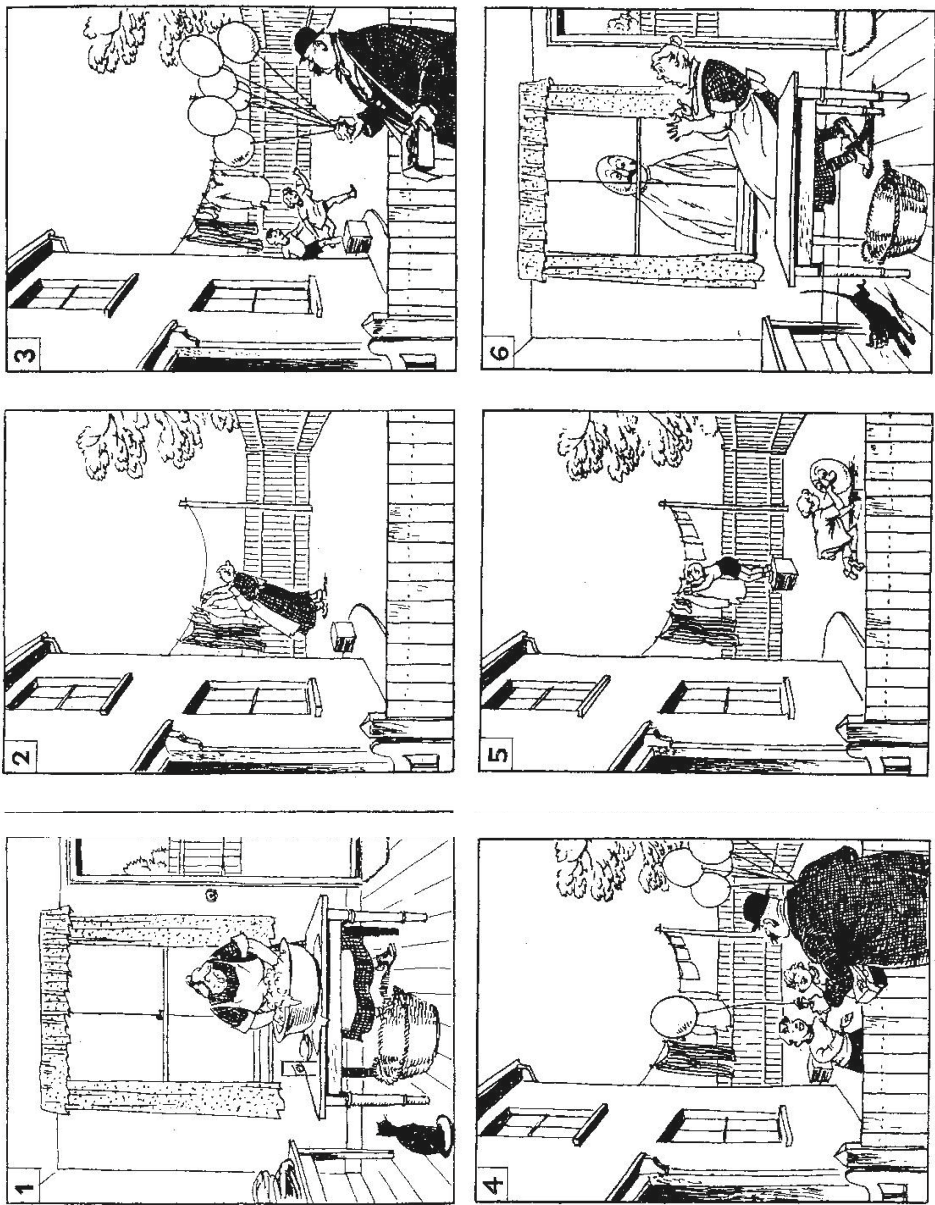

Task 4: Baby Task

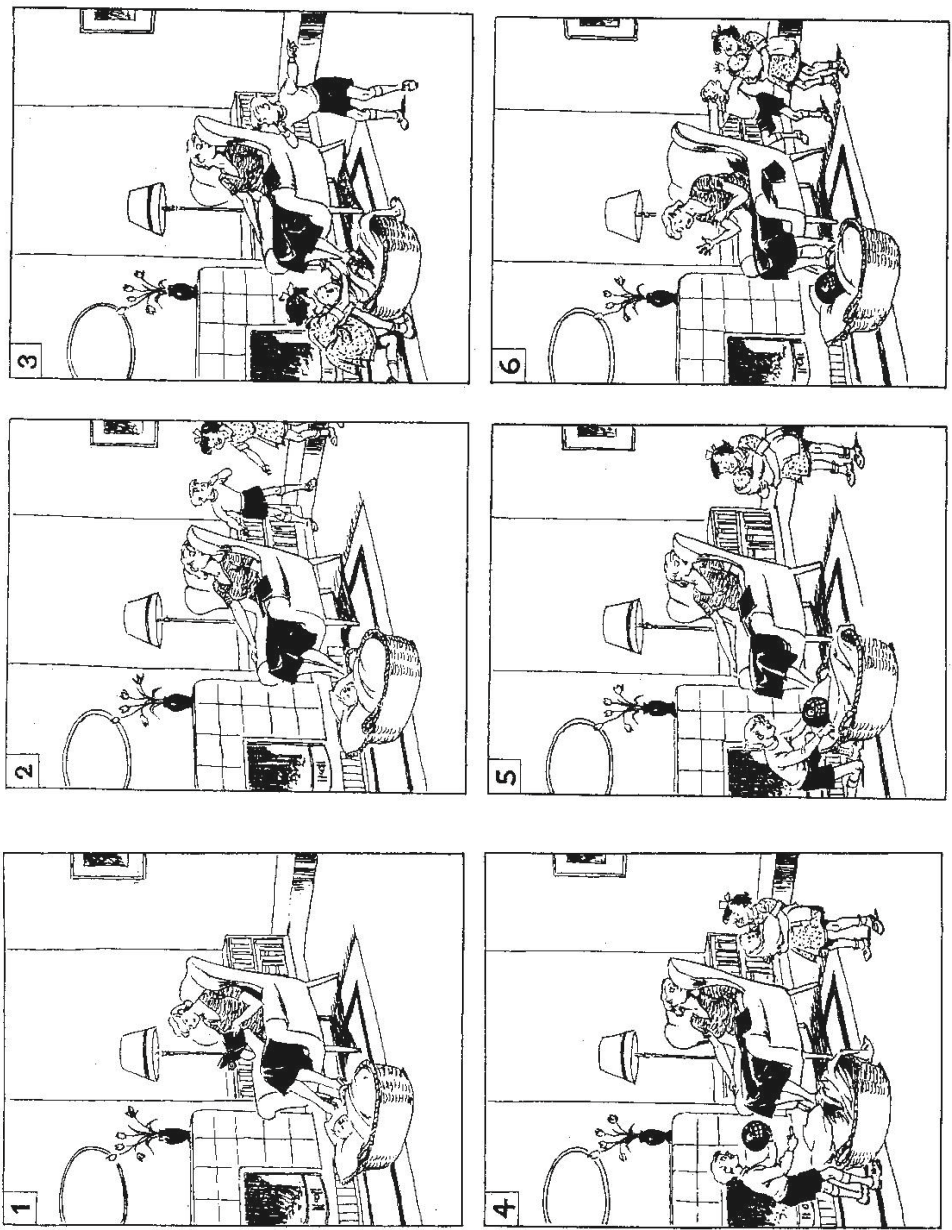

Appendix 2. Analytic Rating Scale (Iwashita et al., 2001, pp. 435-436)

*Fluency*

5. Speaks without hesitation; speech is generally of a speed similar to a native speaker.
4. Speaks fairly fluently with only occasional hesitation, false starts and modification of intended utterance. Speech is only slightly slower than that of a native speaker.
3. Speaks more slowly than a native speaker due to hesitations and word finding delays.
2. A marked degree of hesitation due to word finding delays or inability to phrase utterances easily.
1. Speech is quite disfluent due to frequent and lengthy hesitations or false starts.

*Accuracy*

5. Errors are barely noticeable.
4. Errors are not unusual, but rarely major.
3. Manages most common forms, with occasional errors; major errors present.
2. Limited linguistic control; major errors frequent.
1. Clear lack of linguistic control even of basic forms.

*Complexity*

5. Confidently attempts a variety of verb forms (e.g., passives, modals, tense and aspect), even if the use is not always correct. Regularly takes risks grammatically in the service of expressing complex meaning. Routinely attempts the use of coordination and subordination to convey ideas that cannot be expressed in a single clause, even if the result is occasionally awkward or incorrect.

4. Confidently attempts a variety of verb forms (e.g., passives, modals, tense and aspect), even if the use is not always correct. Takes risks grammatically in the service of expressing complex meaning. Regularly attempts the use of coordination and subordination to convey ideas that cannot be expressed in a single clause, even if the result is occasionally awkward or incorrect.

3. Mostly relies on simple verb forms, with some attempts to use a greater variety of forms (e.g. passives, modals, more varied tense and aspect). Some attempt to use coordination and subordination to convey ideas that cannot be expressed in a single clause.

2. Produces numerous sentence fragments in a predictable set of simple clause structures. If coordination and/or subordination are attempted to express more complex clause relations, this is hesitant and done with difficulty.

1. Produces mostly sentence fragments and simple phrases. Little attempt to use any grammatical means to connect ideas across clauses.
